# Supplementary material for: Effects of Packaging Material Type, Storage Time and Lipid Content on Phthalate Migration in Smoked Fish Meat
Source: MDPI journal article supplement (doi:10.3390/app14041660), 2024-02-19
Supplement: s1 [file s1]

## Supporting Information

# Effects of Packaging Material Type, Storage Time and Lipid Content on Phthalate Migration in Smoked Fish Meat

Boban Đurić <sup>1</sup>, Brankica Kartalović <sup>2</sup>, Kristina Habschied <sup>3</sup>, Nikolina Novakov <sup>1</sup>, Jelena Vranešević <sup>4</sup>, Boris Brkić <sup>2</sup> and Krešimir Mastanjević <sup>3,\*</sup>

<sup>1</sup> Department of Veterinary Medicine, Faculty of Agriculture, University of Novi Sad, Trg Dositeja Obradovića 8, 21000 Novi Sad, Serbia; bobanvet68@gmail.com (B.Đ.); milosevicnina@gmail.com (N.N.)

<sup>2</sup> BioSense Institute, University of Novi Sad, Zorana Đinđića 1, 21000 Novi Sad, Serbia; brankica.kartalovic@gmail.com (B.K.); boris.brkic@biosense.rs (B.B.)

<sup>3</sup> Faculty of Food Technology, Josip Juraj Strossmayer University of Osijek, Franje Kuhača 20, 31000 Osijek, Croatia; kristinahabschied@gmail.com

<sup>4</sup> Scientific Veterinary Institute Novi Sad, Rumenački put 25, 21000 Novi Sad, Serbia; jelena.vet.babic@gmail.com

\* Correspondence: kmastanj@gmail.com; Tel.: +385-31-224-373

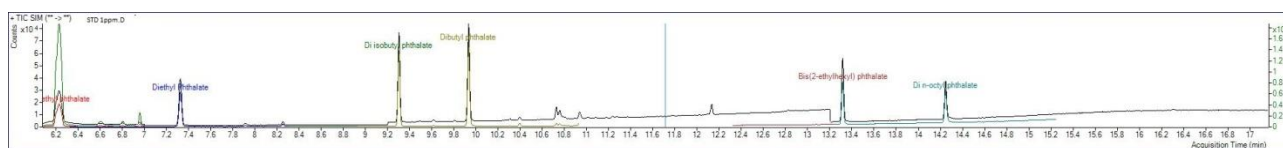

**Figure S1.** Chromatogram of standard reference material of 1 ppm.

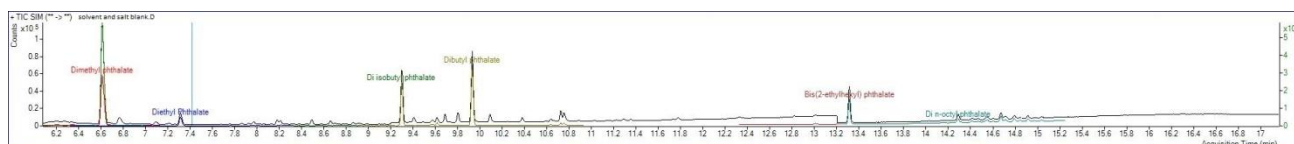

**Figure S2.** Chromatogram of solvent and salt blank.

Dimethyl phthalate - 5 Levels, 5 Levels Used, 5 Points, 5 Points Used, 0 QCs

$y = 251674.642219 \cdot x - 2686.680625$

$R^2 = 0.99785837$

Type: Linear, Origin: Ignore, Weight: None

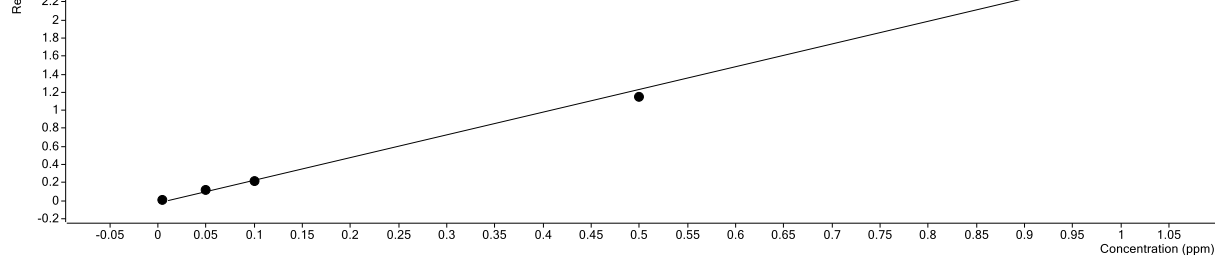

Diethyl Phthalate - 5 Levels, 5 Levels Used, 5 Points, 5 Points Used, 0 QCs

$y = 205918.598910 \cdot x - 1371.141841$   
 $R^2 = 0.99906185$   
Type:Linear, Origin:Ignore, Weight:None

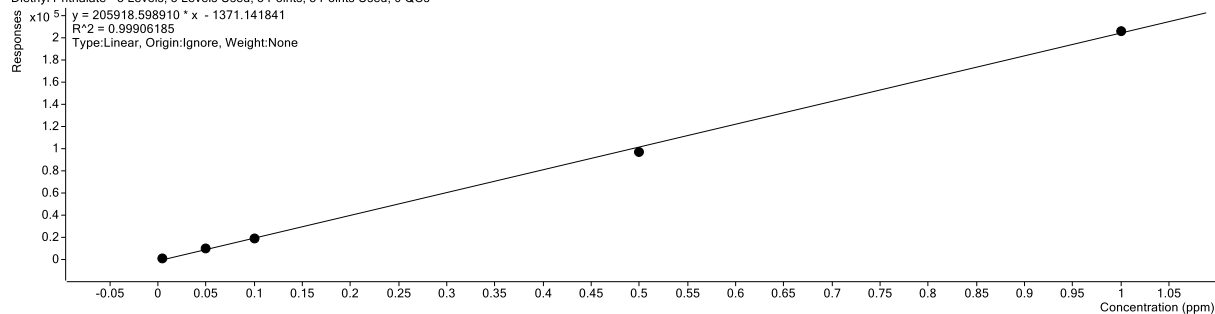

Di isobutyl phthalate - 5 Levels, 5 Levels Used, 5 Points, 5 Points Used, 0 QCs

$y = 303757.986385 \cdot x$   
 $R^2 = 0.99725302$   
Type:Linear, Origin:Force, Weight:None

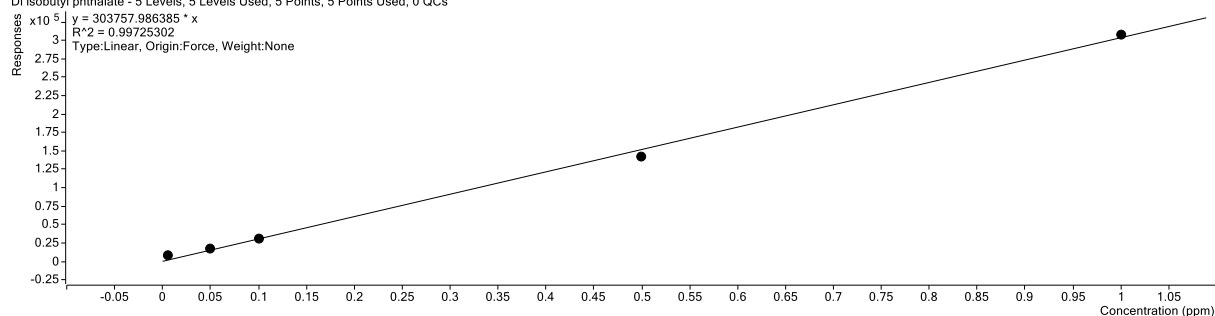

Dibutyl phthalate - 5 Levels, 5 Levels Used, 5 Points, 5 Points Used, 0 QCs

$y = 293801.624172 \cdot x$   
 $R^2 = 0.99848798$   
Type:Linear, Origin:Force, Weight:None

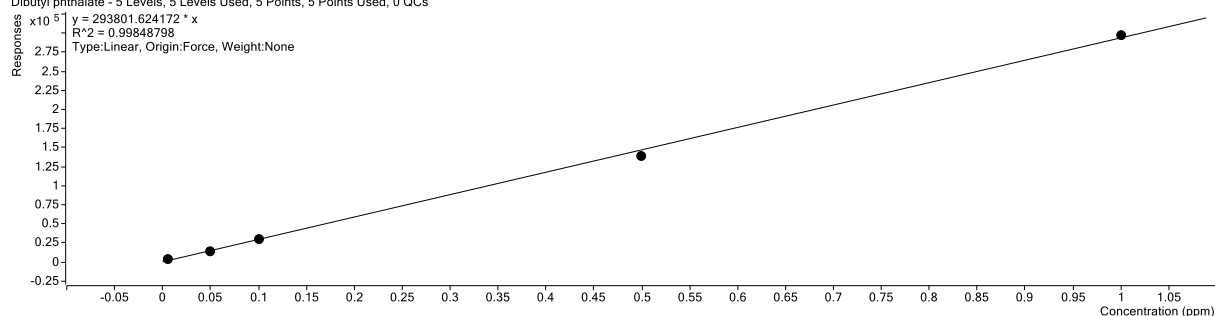

Bis(2-ethylhexyl) phthalate - 5 Levels, 5 Levels Used, 5 Points, 5 Points Used, 0 QCs

$y = 129717.036263 \cdot x$   
 $R^2 = 0.99706569$   
Type:Linear, Origin:Force, Weight:None

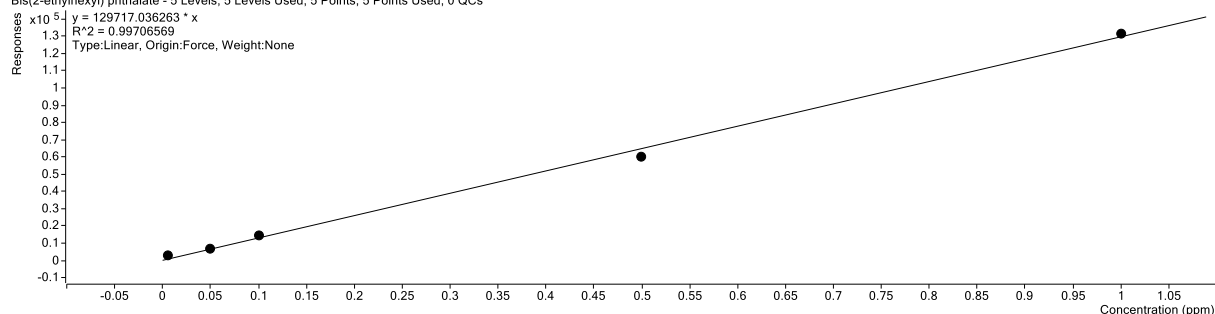

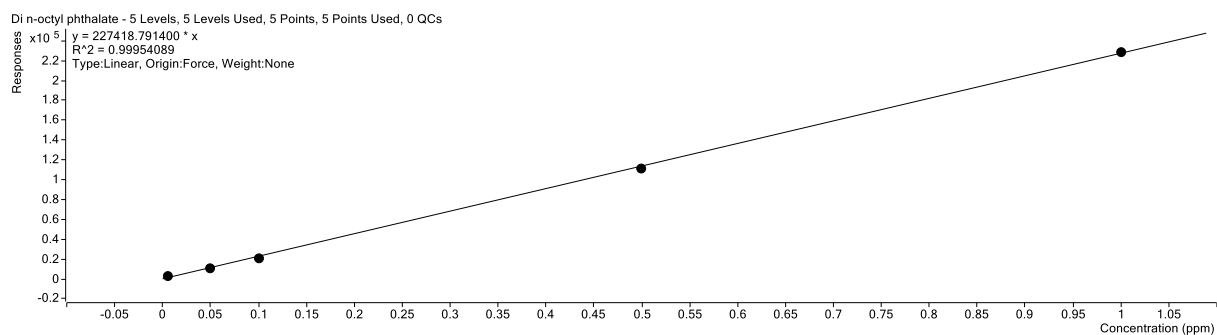

**Figure S3.** The calibration curves for each analyzed phthalate.
